# Supplementary material for: CuII-mediated controllable creation of tertiary and quaternary carbon centers: designed assembly and structures of a new class of copper complexes supported by in situ generated substituted 1-pyridineimidazo[1,5-a]pyridine ligands
Source: Royal Society of Chemistry journal article supplement (doi:10.1039/c3ce00012e), 2013-01-01
Supplement: c3ce00012e.pdf [file c3ce00012e.pdf]

## Supporting Information

**Cu<sup>II</sup>-mediated controllable creation of tertiary and quaternary carbon centers: designed assembly and structures of a new class of copper complexes supported by *in situ* generated substituted 1-pyridineimidazo[1,5-a]pyridine ligands**

**Yanmei Chen, Lei Li, Yanyuan Cao, Jian Wu, Qian Gao, Yahong Li,\* Hailiang Hu, Wei Liu, Yonglu Liu, Zhenghui Kang and Jingping Li**

## Experimental Section

**Materials.** All reagents and solvents were purchased from commercial sources and used as received without further purification. 3-(pyridin-2-yl)imidazo[1,5-a]pyridine (HPIP) was synthesized according to literature procedures.<sup>[S1]</sup> All complexes were synthesized by solvothermal reactions under autogenous pressure.

### Synthesis of bis(3-(pyridin-2-yl)imidazo[1,5-a]pyridin-1-yl)methane (L4)

A mixture of HPIP (0.0397 g, 0.2 mmol), formaldehyde (0.10 mmol), and glacial acetic acid (2 mL) was sealed in a 6 mL Pyrex-tube and heated at 125 °C for 2 hours. After cooling to room temperature slowly, yellow needle crystals were obtained. Yield: 0.0118 g (29 %).

The <sup>1</sup>H NMR spectrum of **L4** has been determined.

### Synthesis of [L1Co<sub>2</sub>Cl<sub>4</sub>]·2EtOH (4·2EtOH)

A mixture of HPIP (0.0395 g, 0.2 mmol), formaldehyde (0.05 mmol), CoCl<sub>2</sub>·6H<sub>2</sub>O (0.0238 g, 0.10 mmol), and ethanol (2 mL) was sealed in a 6 mL Pyrex-tube and heated at 135 °C for 3 days. After cooling to room temperature slowly, brown rod crystals were obtained. Yield: 0.0121 g (21%, based on Co). Elemental anal. (%) Calcd. for C<sub>53</sub>H<sub>44</sub>Cl<sub>4</sub>Co<sub>2</sub>N<sub>12</sub>O<sub>2</sub>: C, 55.81; H, 3.89; N, 14.74; Found: C, 55.24; H, 3.85; N, 15.00.

### Synthesis of L4ZnCl<sub>2</sub> (5)

A mixture of HPIP (0.0394 g, 0.2 mmol), formaldehyde (0.10 mmol), ZnCl<sub>2</sub> (0.0138 g, 0.10 mmol), and ethanol (2 mL) was sealed in a 6 mL Pyrex-tube and heated at 125 °C for 3 days. After cooling to room temperature slowly, yellow block crystals were obtained. Yield: 0.0153 g (28 %, based on Zn). Elemental anal. (%) Calcd. for C<sub>25</sub>H<sub>18</sub>Cl<sub>2</sub>N<sub>6</sub>Zn: N, 15.60; C, 55.74; H, 3.37; Found: N, 15.76; C, 55.73; H, 3.28.

[S1] O. Niyomura, Y. Yamaguchi, S. Tamura, M. Minoura and Y. Okamoto. *Chem. Lett.* 2011, **40**, 449-451.

**Table S1** Crystal data and structure refinement information for complexes **4**·2EtOH, **5** and **L4**.

|                                                      | <b>4</b> ·2EtOH                                                                                | <b>5</b>                                                          | <b>L4</b>                                      |
|------------------------------------------------------|------------------------------------------------------------------------------------------------|-------------------------------------------------------------------|------------------------------------------------|
| Formula <sup>a</sup>                                 | C <sub>53</sub> H <sub>44</sub> Cl <sub>4</sub> Co <sub>2</sub> N <sub>12</sub> O <sub>2</sub> | C <sub>25</sub> H <sub>18</sub> Cl <sub>2</sub> N <sub>6</sub> Zn | C <sub>25</sub> H <sub>18</sub> N <sub>6</sub> |
| <i>M</i> / g·mol <sup>-1</sup> <sup>a</sup>          | 1140.66                                                                                        | 538.72                                                            | 402.45                                         |
| Crystal system                                       | Monoclinic                                                                                     | Triclinic                                                         | Monoclinic                                     |
| Space group                                          | C 2/c                                                                                          | P -1                                                              | P 2/c                                          |
| <i>a</i> / Å                                         | 24.935(3)                                                                                      | 7.8615(6)                                                         | 12.8398(18)                                    |
| <i>b</i> / Å                                         | 14.5352(15)                                                                                    | 10.7668(8)                                                        | 5.1086(7)                                      |
| <i>c</i> / Å                                         | 17.7035(19)                                                                                    | 14.0784(10)                                                       | 15.192(2)                                      |
| <i>α</i> / °                                         | 90                                                                                             | 73.473(1)                                                         | 90                                             |
| <i>β</i> / °                                         | 131.687(2)                                                                                     | 84.73(2)                                                          | 105.007(3)                                     |
| <i>γ</i> / °                                         | 90                                                                                             | 89.354(1)                                                         | 90                                             |
| <i>V</i> / Å <sup>3</sup>                            | 4791.7(9)                                                                                      | 1137.44(15)                                                       | 962.5(2)                                       |
| <i>Z</i>                                             | 4                                                                                              | 2                                                                 | 2                                              |
| <i>T</i> /K                                          | 296(2)                                                                                         | 293(2)                                                            | 296(2)                                         |
| <i>λ</i> / Å <sup>b</sup>                            | 0.71073                                                                                        | 0.71073                                                           | 0.71073                                        |
| <i>ρ</i> <sub>c</sub> / g·cm <sup>-3</sup>           | 1.581                                                                                          | 1.573                                                             | 1.389                                          |
| <i>μ</i> / mm <sup>-1</sup>                          | 0.974                                                                                          | 1.342                                                             | 0.087                                          |
| <i>F</i> (000)                                       | 2336                                                                                           | 548                                                               | 420                                            |
| <i>θ</i> range / °                                   | 2.79 - 25.00                                                                                   | 2.12 - 25.00                                                      | 2.78 - 28.31                                   |
| Measd/independent                                    | 15882 / 4194                                                                                   | 6233 / 3923                                                       | 6416 / 2378                                    |
| <i>R</i> <sub>int</sub> reflections                  | 0.0499                                                                                         | 0.0144                                                            | 0.0215                                         |
| obsd reflns [ <i>I</i> > 2σ ( <i>I</i> )]            | 4194                                                                                           | 3923                                                              | 2378                                           |
| <i>R</i> <sub>1</sub> <sup>c</sup>                   | 0.0527                                                                                         | 0.0313                                                            | 0.0401                                         |
| w <i>R</i> <sub>2</sub> <sup>d,e</sup>               | 0.1439                                                                                         | 0.1106                                                            | 0.1149                                         |
| GOF on <i>F</i> <sup>2</sup>                         | 1.027                                                                                          | 1.105                                                             | 1.080                                          |
| (Δ <i>ρ</i> ) <sub>max,min</sub> / e·Å <sup>-3</sup> | 2.665, -0.846                                                                                  | 0.496, -0.315                                                     | 0.180, -0.204                                  |

<sup>a</sup> Including solvate molecules. <sup>b</sup> Mo Kα radiation. <sup>c</sup>  $R_1 = \sum(|F_o| - |F_c|) / \sum(|F_o|)$  for observed reflections. <sup>d</sup>  $w = 1 / [\sigma^2(F_o^2) + (aP)^2 + bP]$  and  $P = [\max(F_o^2, 0) + 2F_c^2] / 3$ .  
<sup>e</sup>  $wR_2 = \{\sum[w(F_o^2 - F_c^2)^2] / \sum[w(F_o^2)^2]\}^{1/2}$  for all data.

**Table S2** Selected bond lengths [ $\text{\AA}$ ] and angles [ $^\circ$ ] for complex **1**·2EtOH

|                  |           |                     |          |
|------------------|-----------|---------------------|----------|
| Cu(1)-N(2)       | 1.949 (8) | Cu(1)-N(4)          | 2.062(9) |
| Cu(1)-N(5)       | 1.962(9)  | Cu(1)-Cl(1)         | 2.515(3) |
| Cu(1)-N(1)       | 2.025(11) |                     |          |
| N(2)-Cu(1)-N(5)  | 85.0(3)   | N(1)-Cu(1)-Cl(1)    | 89.8(3)  |
| N(2)-Cu(1)-N(1)  | 80.8(4)   | N(4)-Cu(1)-Cl(1)    | 92.5(3)  |
| N(5)-Cu(1)-N(1)  | 163.2(4)  | Cu(2)#2-Cl(3)-Cu(2) | 91.5(4)  |
| N(2)-Cu(1)-N(4)  | 161.7(4)  | Cl(3)-Cu(2)-Cl(2)   | 173.4(3) |
| N(5)-Cu(1)-N(4)  | 80.9(4)   | Cu(3)-Cl(2)-Cu(2)   | 89.2(3)  |
| N(1)-Cu(1)-N(4)  | 111.0(4)  | Cl(2)-Cu(3)-Cl(4)   | 160.6(3) |
| N(2)-Cu(1)-Cl(1) | 101.7(3)  | Cu(3)#2-Cl(4)-Cu(3) | 115.0(4) |
| N(5)-Cu(1)-Cl(1) | 101.8(3)  |                     |          |

Symmetry transformations used to generate equivalent atoms:

#1 -x+2, y, -z+3/2      #2 -x+1, y, -z+3/2

**Table S3** Hydrogen bond lengths [ $\text{\AA}$ ] and angles [ $^\circ$ ] for complex **1**·2EtOH

| D-H...A               | d(D-H) | d(H...A) | d(D...A)  | $\angle(\text{DHA})$ |
|-----------------------|--------|----------|-----------|----------------------|
| O(1)-H(1)...Cl(1)     | 0.82   | 2.56     | 3.24(3)   | 141.0                |
| O(1B)-H(1B)...Cl(1)   | 0.82   | 2.65     | 3.12(4)   | 117.9                |
| C(10)-H(10)...Cl(1)#1 | 0.93   | 2.65     | 3.497(15) | 151.3                |
| C(7)-H(7)...Cl(4)     | 0.93   | 2.68     | 3.472(15) | 143.6                |
| C(18)-H(18)...Cl(2)#3 | 0.93   | 2.77     | 3.520(16) | 138.8                |

Symmetry transformations used to generate equivalent atoms:

#1 -x+1,y,-z+1/2      #2 -x,y,-z+1/2      #3 -x,-y+1,-z

**Table S4** Selected bond lengths [Å] and angles [°] for complex **2**·2EtOH.

|                                                             |                  |                     |            |
|-------------------------------------------------------------|------------------|---------------------|------------|
| Cu(1)-N(5)#1                                                | 1.991(2)         | Cu(2)-N(7)#1        | 2.091(2)   |
| Cu(1)-N(2)                                                  | 1.992(2)         | Cu(3)-Cl(1)#2       | 2.0809(10) |
| Cu(1)-N(1)                                                  | 2.080(2)         | Cu(3)-Cl(1)         | 2.0809(10) |
| Cu(1)-N(4)#1                                                | 2.091(2)         | Cu(4)-Cl(3)         | 2.0720(13) |
| Cu(2)-N(8)#1                                                | 1.998(2)         | Cu(4)-Cl(2)         | 2.0790(14) |
| Cu(2)-N(8)                                                  | 1.998(2)         | N(5)-Cu(1)#1        | 1.991(2)   |
| Cu(2)-N(7)                                                  | 2.091(2)         |                     |            |
| N(5)#1-Cu(1)-N(2)                                           | 133.36(8)        | N(8)#1-Cu(2)-N(7)   | 80.46(9)   |
| N(5)#1-Cu(1)-N(1)                                           | 130.77(9)        | N(8)-Cu(2)-N(7)     | 131.28(9)  |
| N(2)-Cu(1)-N(1)                                             | 81.28(8)         | N(8)#1-Cu(2)-N(7)#1 | 131.28(9)  |
| N(5)#1-Cu(1)-N(4)#1                                         | 81.15(9)         | N(8)-Cu(2)-N(7)#1   | 80.46(9)   |
| N(2)-Cu(1)-N(4)#1                                           | 128.43(9)        | N(7)-Cu(2)-N(7)#1   | 105.63(14) |
| N(1)-Cu(1)-N(4)#1                                           | 104.45(9)        | Cl(1)#2-Cu(3)-Cl(1) | 178.19(7)  |
| N(8)#1-Cu(2)-N(8)                                           | 131.75(12)       | Cl(3)-Cu(4)-Cl(2)   | 175.80(5)  |
|                                                             | )                |                     |            |
| Symmetry transformations used to generate equivalent atoms: |                  |                     |            |
|                                                             | #1 -x+1,y,-z+1/2 | #2 -x,y,-z+1/2      |            |

**Table S5** Hydrogen bond lengths [Å] and angles [°] for complex **2**·2EtOH

| D-H...A                                                     | d(D-H)            | d(H...A)              | d(D...A)               | <(DHA) |
|-------------------------------------------------------------|-------------------|-----------------------|------------------------|--------|
| O(1)-H(1)...Cl(2)#3                                         | 0.85              | 2.37                  | 3.175(4)               | 157.9  |
| C(2)-H(2)...O(1)                                            | 0.93              | 2.45                  | 3.327(5)               | 156.1  |
| C(7)-H(7)...O(1)                                            | 0.93              | 2.46                  | 3.321(5)               | 154.8  |
| C(13)-H(13)...Cl(1)                                         | 0.98              | 2.78                  | 3.758(3)               | 173.1  |
| C(18)-H(18)...Cl(2)#4                                       | 0.93              | 2.74                  | 3.640(3)               | 162.6  |
| C(32)-H(32)...Cl(3)#5                                       | 0.93              | 2.65                  | 3.444(3)               | 143.3  |
| Symmetry transformations used to generate equivalent atoms: |                   |                       |                        |        |
|                                                             | #1 -x+1,y,-z+1/2  | #2 -x,y,-z+1/2        | #3 -x+1/2,y-1/2,-z+1/2 |        |
|                                                             | #4 -x+1,-y+1,-z+1 | #5 x+1/2,-y+1/2,z-1/2 |                        |        |

**Table S6** Selected bond lengths [ $\text{\AA}$ ] and angles [ $^\circ$ ] for complex **3**

|             |            |                  |            |
|-------------|------------|------------------|------------|
| Cu(1)-N(2)  | 2.016(4)   | N(2)-Cu(1)-N(5)  | 93.48(15)  |
| Cu(1)-N(5)  | 2.043(3)   | N(2)-Cu(1)-Cl(1) | 132.98(11) |
| Cu(1)-Cl(1) | 2.1379(16) | N(5)-Cu(1)-Cl(1) | 128.97(11) |

**Table S7** Hydrogen bond lengths [ $\text{\AA}$ ] and angles [ $^\circ$ ] for complex **3**

| D-H...A              | d(D-H) | d(H...A) | d(D...A) | <(DHA) |
|----------------------|--------|----------|----------|--------|
| C(7)-H(7)...N(1)     | 0.93   | 2.41     | 2.948(7) | 116.8  |
| C(18)-H(18)...N(1)#2 | 0.93   | 2.44     | 3.276(7) | 149.9  |
| C(20)-H(20)...N(4)   | 0.93   | 2.37     | 2.912(7) | 117.0  |

Symmetry transformations used to generate equivalent atoms:

#1 -x+1, -y, -z+1      #2 x, y, z+1

**Table S8** Selected bond lengths [Å] and angles [°] for complex **4**·2EtOH

|                      |            |                      |            |
|----------------------|------------|----------------------|------------|
| Co(1)-N(2)           | 2.100(3)   | Co(1)-N(1)           | 2.203(3)   |
| Co(1)-N(2)#1         | 2.100(3)   | Co(1)-Cl(1)#1        | 2.4161(11) |
| Co(1)-N(1)#1         | 2.203(3)   | Co(1)-Cl(1)          | 2.4161(11) |
| N(2)-Co(1)-N(2)#1    | 82.45(17)  | N(5)#1-Co(2)-N(5)    | 82.60(17)  |
| N(2)-Co(1)-N(1)#1    | 157.66(13) | N(5)#1-Co(2)-N(4)#1  | 156.57(13) |
| N(2)#1-Co(1)-N(1)#1  | 75.28(12)  | N(5)-Co(2)-N(4)#1    | 74.59(13)  |
| N(2)-Co(1)-N(1)      | 75.28(12)  | N(5)#1-Co(2)-N(4)    | 74.59(13)  |
| N(2)#1-Co(1)-N(1)    | 157.66(13) | N(5)-Co(2)-N(4)      | 156.57(13) |
| N(1)#1-Co(1)-N(1)    | 127.03(18) | N(4)#1-Co(2)-N(4)    | 128.6(2)   |
| N(2)-Co(1)-Cl(1)#1   | 98.81(9)   | N(5)#1-Co(2)-Cl(2)   | 103.27(10) |
| N(2)#1-Co(1)-Cl(1)#1 | 100.98(9)  | N(5)-Co(2)-Cl(2)     | 98.61(9)   |
| N(1)#1-Co(1)-Cl(1)#1 | 84.01(9)   | N(4)#1-Co(2)-Cl(2)   | 85.64(11)  |
| N(1)-Co(1)-Cl(1)#1   | 84.30(9)   | N(4)-Co(2)-Cl(2)     | 81.77(11)  |
| N(2)-Co(1)-Cl(1)     | 100.98(9)  | N(5)#1-Co(2)-Cl(2)#1 | 98.61(9)   |
| N(2)#1-Co(1)-Cl(1)   | 98.81(9)   | N(5)-Co(2)-Cl(2)#1   | 103.27(10) |
| N(1)#1-Co(1)-Cl(1)   | 84.30(9)   | N(4)#1-Co(2)-Cl(2)#1 | 81.77(11)  |
| N(1)-Co(1)-Cl(1)     | 84.01(9)   | N(4)-Co(2)-Cl(2)#1   | 85.64(11)  |
| Cl(1)#1-Co(1)-Cl(1)  | 153.59(6)  | Cl(2)-Co(2)-Cl(2)#1  | 150.75(7)  |

Symmetry transformations used to generate equivalent atoms:

#1 -x+2,y,-z+1/2

**Table S9** Hydrogen bond lengths [Å] and angles [°] for complex **4**·2EtOH

| D-H...A             | d(D-H) | d(H...A) | d(D...A) | <(DHA) |
|---------------------|--------|----------|----------|--------|
| O(1)-H(1)...Cl(2)#2 | 0.82   | 2.61     | 3.404(5) | 165.1  |
| C(10)-H(10)...Cl(2) | 0.93   | 2.65     | 3.459(4) | 146.1  |
| C(23)-H(23)...Cl(1) | 0.93   | 2.60     | 3.427(4) | 148.4  |

Symmetry transformations used to generate equivalent atoms:

#1 -x+2,y,-z+1/2    #2 x-1/2,y+1/2,z

**Table S10** Selected bond lengths [ $\text{\AA}$ ] and angles [ $^\circ$ ] for complex **5**

|                  |           |                   |            |
|------------------|-----------|-------------------|------------|
| Zn(1)-N(2)       | 2.034(2)  | Zn(1)-Cl(1)       | 2.1804(10) |
| Zn(1)-N(1)       | 2.085(2)  | Zn(1)-Cl(2)       | 2.2080(10) |
| N(2)-Zn(1)-N(1)  | 79.71(9)  | N(2)-Zn(1)-Cl(2)  | 111.04(7)  |
| N(2)-Zn(1)-Cl(1) | 118.56(7) | N(1)-Zn(1)-Cl(2)  | 110.48(7)  |
| N(1)-Zn(1)-Cl(1) | 113.78(8) | Cl(1)-Zn(1)-Cl(2) | 117.33(4)  |



**Fig. S1** 30% ORTEP structure of complex **1**·2EtOH.

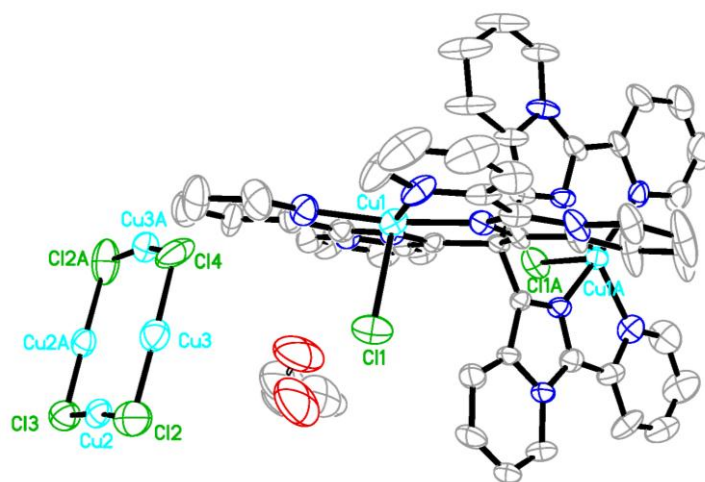

**Fig. S2** Hydrogen bond structure of complex **1**·2EtOH (other hydrogen atoms of **L1** were omitted for clarity)

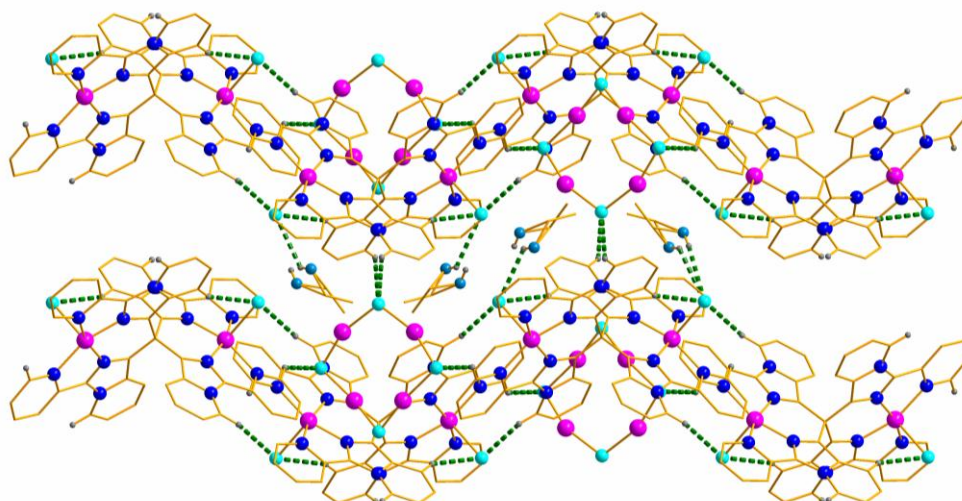

**Fig. S3** IR spectrum of complex **1**·2EtOH

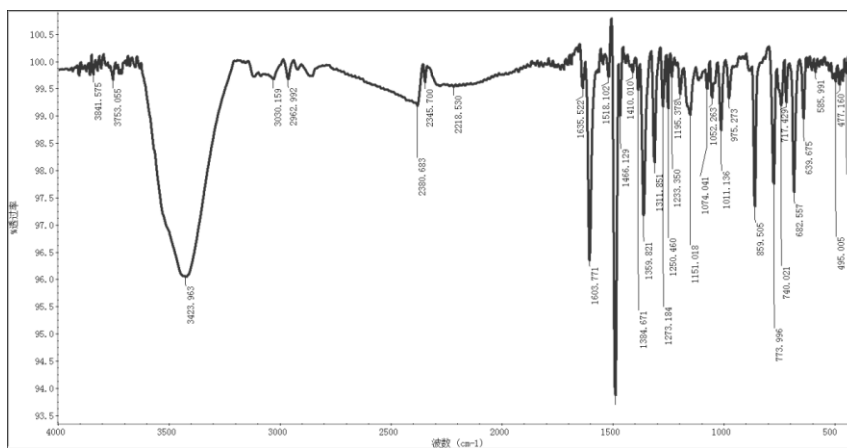

**Fig. S4** 30% ORTEP structure of complex **2**·2EtOH.

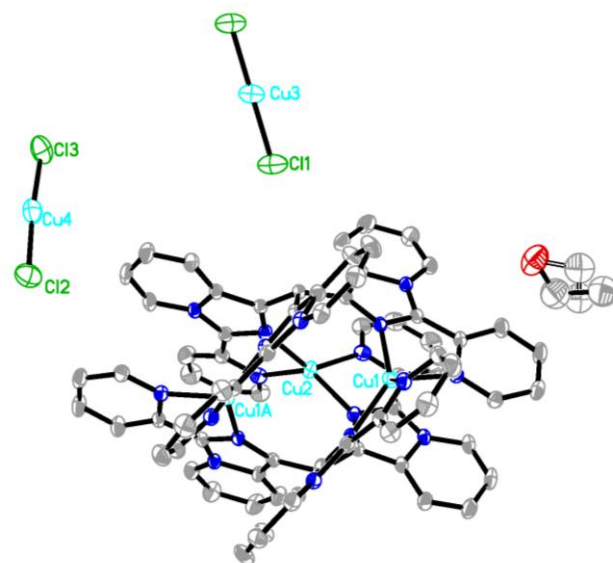

**Fig. S5** IR spectrum of complex **2**·2EtOH

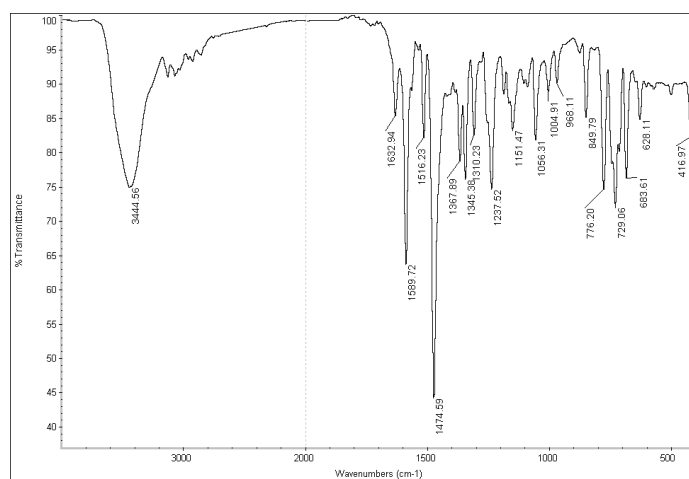

**Fig. S6** IR spectrum of complex **3**

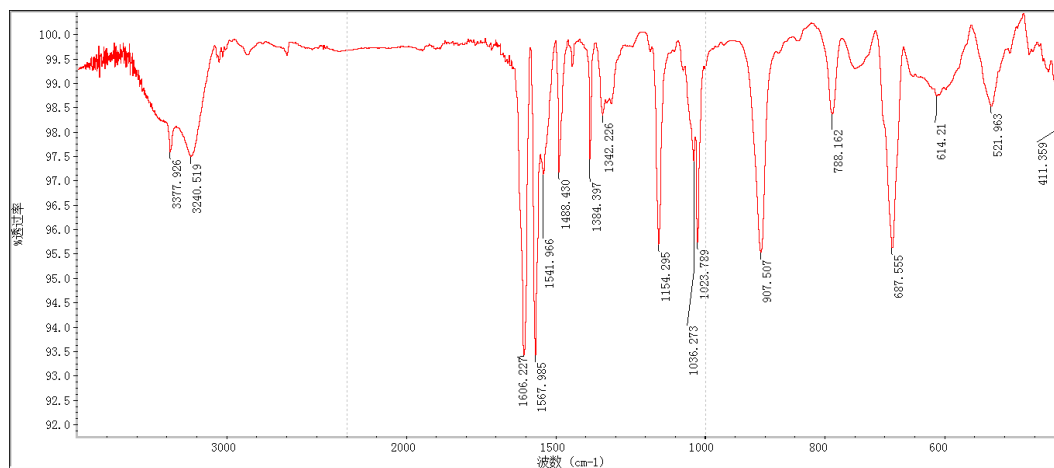

**Fig. S7** 30% ORTEP structure of complex **L4**

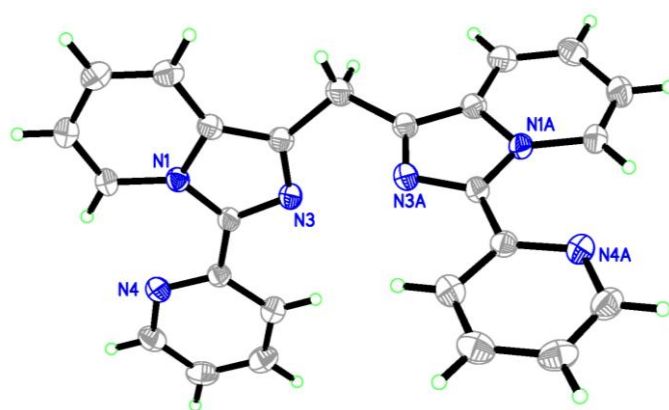

**Fig. S8** IR spectrum of compound **L4**

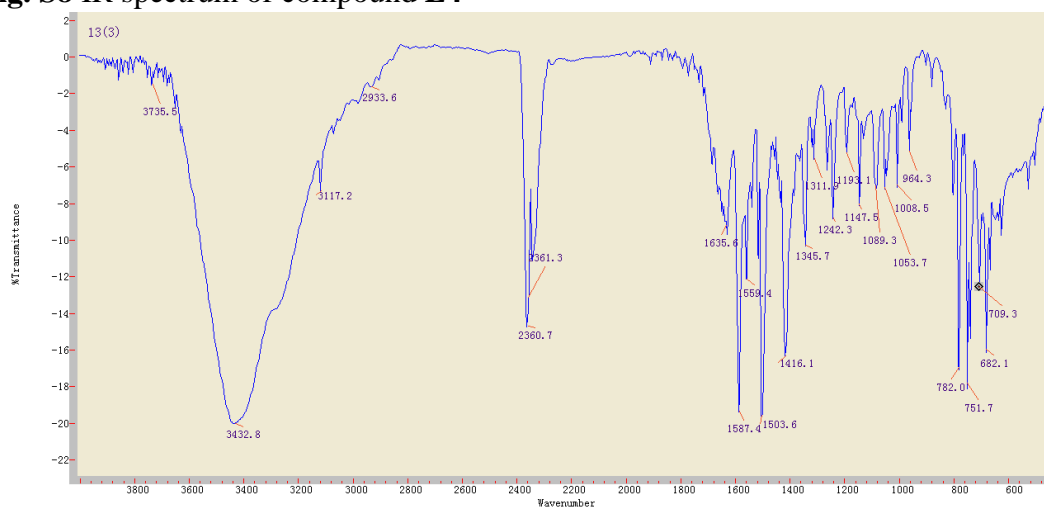

**Fig. 9** <sup>1</sup>H NMR spectrum of compound **L4**

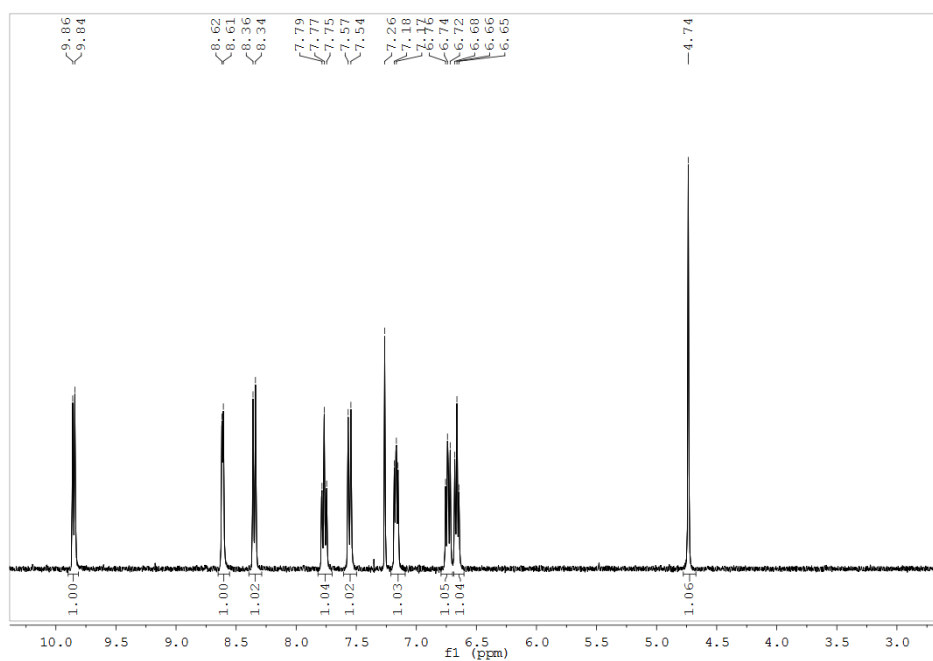

**Fig. S10** 30% ORTEP structure of complex **4**·2EtOH

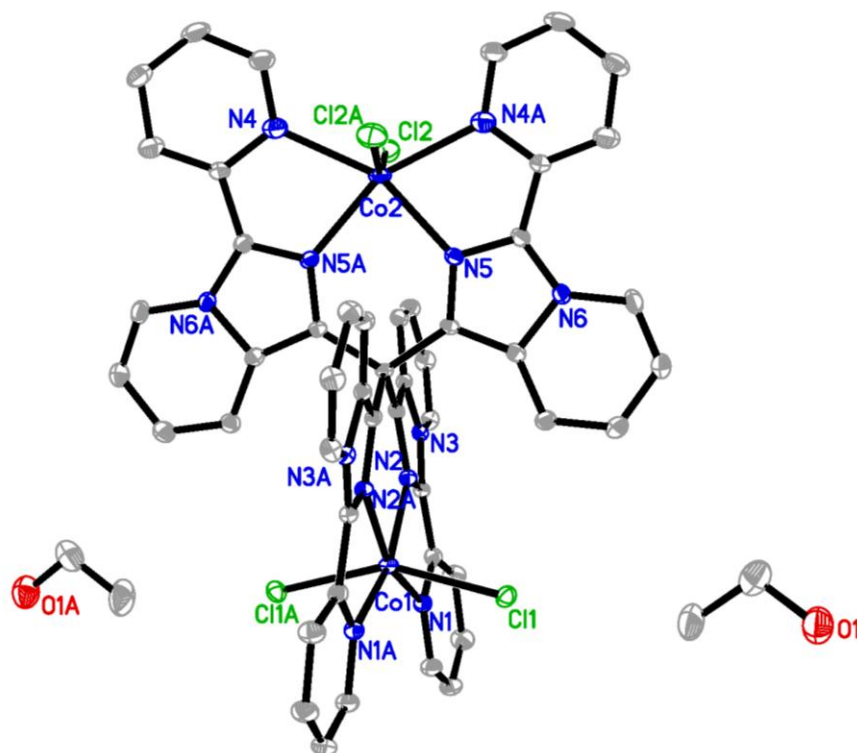

**Fig. S11** Intermolecular hydrogen bond structure of complex **4**·2EtOH

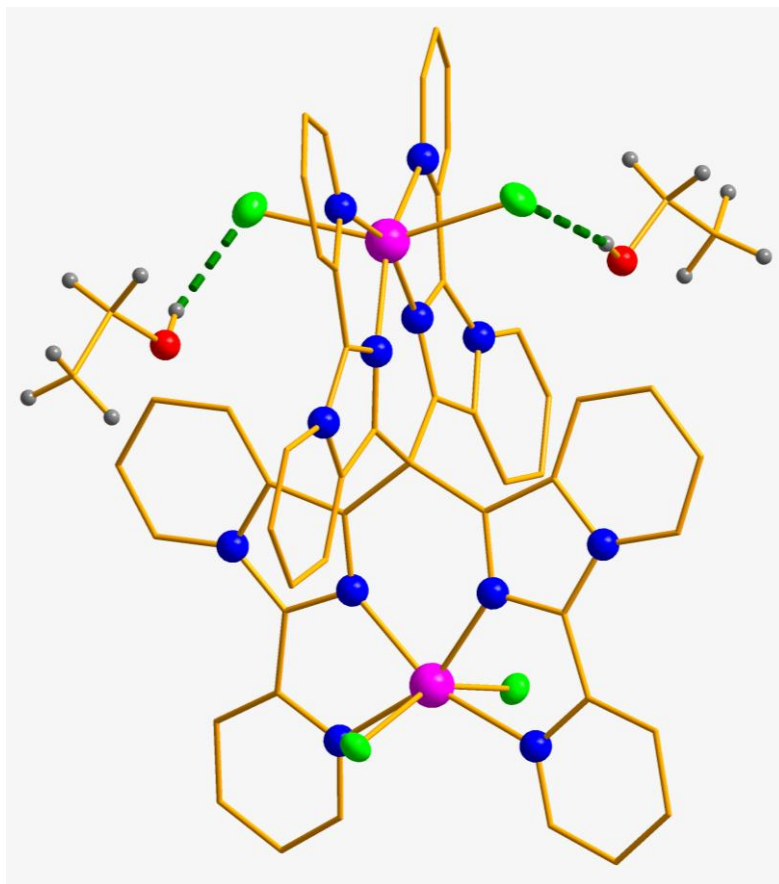

**Fig. S12** The  $\pi$ - $\pi$  stacking interactions of complex **4**·2EtOH

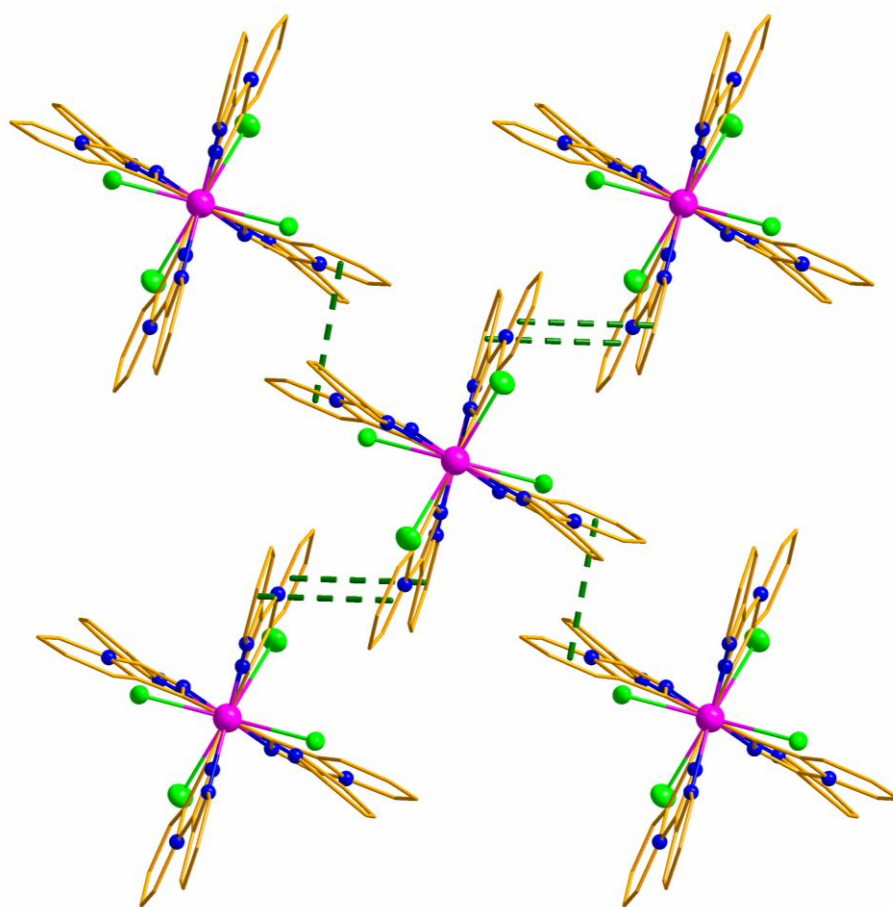

**Fig. S13** IR spectrum of complex **4**·2EtOH

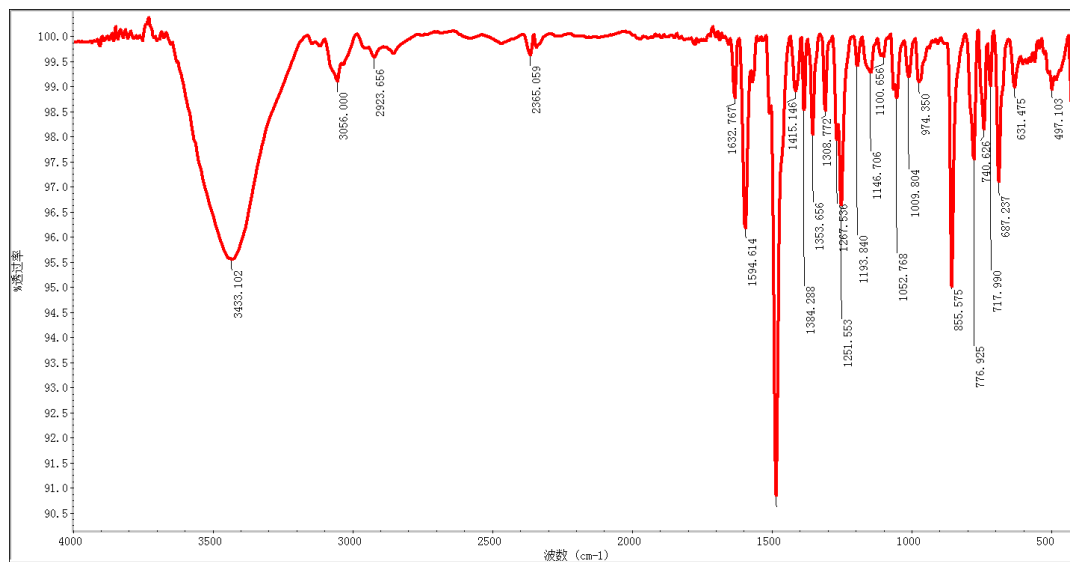

**Fig. S14** 30% ORTEP structure of complex **5**

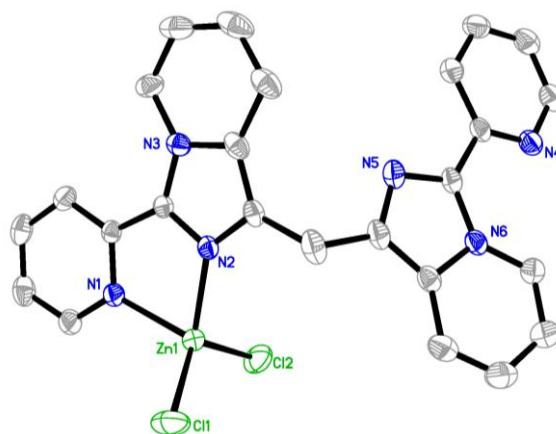

**Fig. S15** IR spectrum of complex **5**

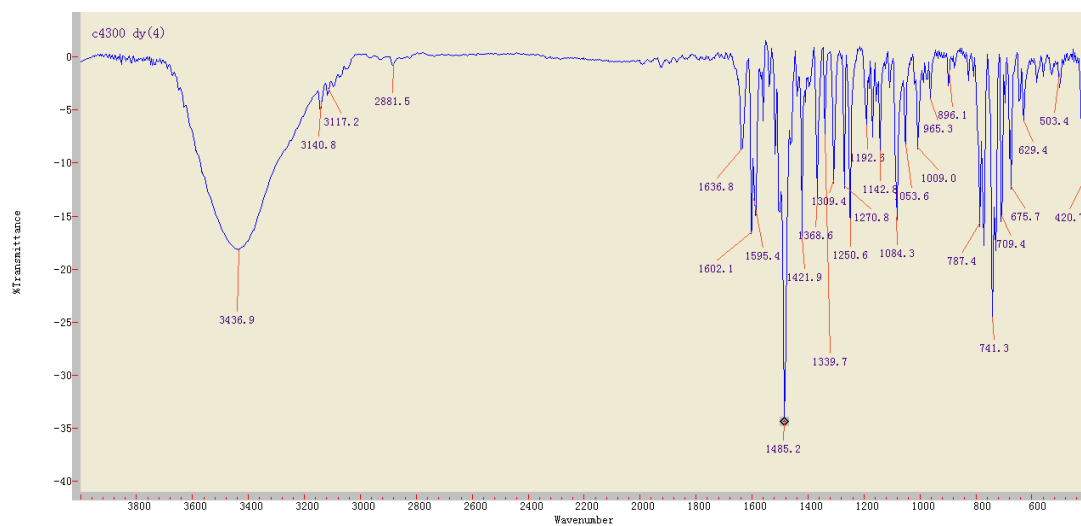

**Scheme S1** The proposed radical mechanisms for the formations of the **L1-L3** ligands from formic acid, N,N-dimethyl amide and oxalaldehyde

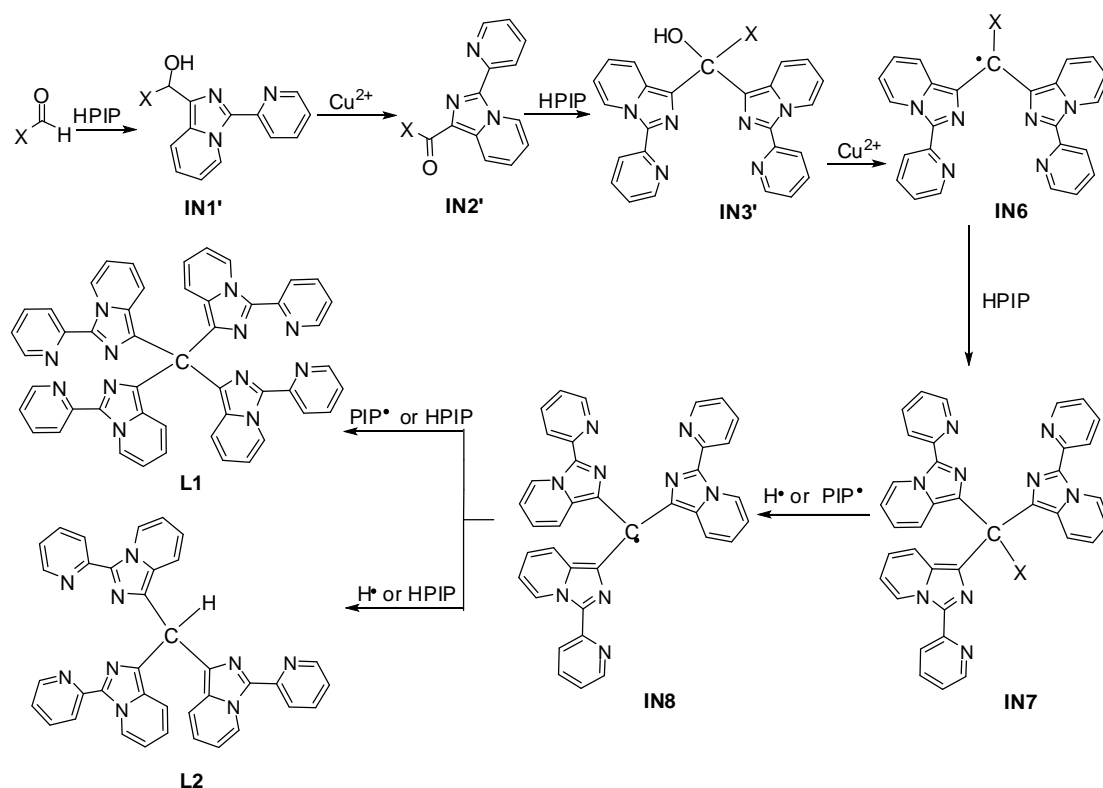

The proposed mechanisms for the constructions of **L1** and **L2** from formic acid, N,N-dimethyl amide and oxalaldehyde are outlined in Scheme S1. Initially, the condensation reaction between HPIP and  $XCHO$  ( $X = OH, NMe_2, CHO$ ) gives an alcoholic intermediate **IN1'**, which is then oxidized by  $Cu^{2+}$  to produce **IN2'**. The subsequent condensation of **IN2'** with another equiv of HPIP generates a new alcoholic intermediate **IN3'**. Next, the cleavage of C-O bond of **IN3'** gives a radical intermediate **IN6**, which then attacks the electron-rich HPIP to afford a new compound **IN7**. The attack of the radical produced by HPIP to **IN7** produces a new radical **IN8**. Two competitive reactions may occur for **IN8**. (1) Formation of **L1** upon combining with a PIP radical or attacking HPIP. (2) **IN8** combines with a hydrogen radical or attacks one equiv of HPIP to generate **L2**.
